# Supplementary material for: Regulation of Structure and Quality of Dried Noodles by Liquid Pre-Fermentation
Source: MDPI journal article supplement (doi:10.3390/foods10102408), 2021-10-11
Supplement: s1 [file s1]

**Table S1.** Detection results of volatile substances of dried noodles under different fermentation time and amount of yeast added

|           | Retention<br>time<br>(min) | Volatile compound                | Relative content (%) |       |      |      |      |      |      |      |       |          |
|-----------|----------------------------|----------------------------------|----------------------|-------|------|------|------|------|------|------|-------|----------|
|           |                            |                                  | 0 h-                 | 1 h-  | 1 h- | 1 h- | 3 h- | 3 h- | 3 h- | 6 h- | 6 h-  | 6 h-     |
|           |                            |                                  | 0.0%                 | 0.2%  | 0.5% | 1.0% | 0.2% | 0.5% | 1.0% | 0.2% | 0.5%  | 1.0<br>% |
| Alcohols  |                            |                                  |                      |       |      |      |      |      |      |      |       |          |
| 1         | 24.957                     | Tetradecanol                     | -                    | -     | -    | -    | 1.85 | -    | -    | -    | -     | -        |
| 2         | 29.844                     | Lauryl alcohol                   | -                    | -     | -    | -    | 1.25 | -    | -    | -    | -     | -        |
| 3         | 29.875                     | 2- butyl -1- octanol             | 1.07                 | -     | -    | -    | -    | -    | -    | -    | -     | 0.50     |
| Aldehydes |                            |                                  |                      |       |      |      |      |      |      |      |       |          |
| 1         | 3.149                      | N-hexanal                        | 1.81                 | -     | -    | -    | -    | -    | -    | -    | -     | -        |
| 2         | 8.586                      | Phenyl aldehyde                  | 2.48                 | 14.77 | 9.32 | -    | 5.91 | 6.05 | 4.68 | 6.24 | 2.06  | 2.09     |
| 3         | 8.706                      | (Z)-2- heptene<br>aldehyde       | 0.68                 | -     | -    | -    | -    | -    | -    | -    | -     | -        |
| 4         | 13.645                     | Nonanal                          | 2.33                 | -     | -    | 9.24 | -    | -    | -    | 5.88 | 2.58  | -        |
| 5         | 16.888                     | Decanal                          | 6.10                 | -     | -    | -    | -    | -    | -    | -    | 0.72  | -        |
| 6         | 32.345                     | Stearaldehyde                    | -                    | -     | -    | -    | -    | -    | -    | -    | -     | 1.39     |
| Esters    |                            |                                  |                      |       |      |      |      |      |      |      |       |          |
| 1         | 9.868                      | Ethyl caproate                   | -                    | -     | -    | -    | -    | -    | -    | -    | -     | 0.98     |
| 2         | 24.163                     | Tetradecyl<br>methoxyacetate     | -                    | -     | -    | -    | 2.56 | 2.03 | 1.93 | -    | 4.70  | -        |
| 3         | 24.183                     | Pentadecyl<br>methoxyacetate     | -                    | 4.06  | 2.07 | -    | 1.09 | 1.42 | 2.06 | -    | -     | -        |
| 4         | 24.972                     | Cyclobutyl tetradecyl<br>oxalate | -                    | -     | -    | 3.41 | -    | -    | -    | -    | 0.30  | -        |
| 5         | 25.034                     | Propyltetradecyl<br>sulfite      | -                    | -     | -    | 2.68 | 1.28 | -    | -    | -    | 0.71  | -        |
| 6         | 25.169                     | Methoxy tridecane<br>acetate     | -                    | 5.17  | 2.36 | -    | 4.01 | 3.25 | 2.51 | 1.36 | 1.01  | -        |
| 7         | 33.248                     | 1,                               | -                    | -     | 3.13 | -    | 2.06 | 5.99 | -    | 2.66 | 14.85 | 11.3     |

|                   |        |                                                              |       |       |       |       |       |       |       |      |       |           |
|-------------------|--------|--------------------------------------------------------------|-------|-------|-------|-------|-------|-------|-------|------|-------|-----------|
|                   |        | 2-benzodicarboxylic<br>acid bis<br>(2-methylpropyl)<br>ester |       |       |       |       |       |       |       |      |       | 1         |
| 8                 | 33.481 | N-octyl phthalate                                            | 0.98  | -     | -     | -     | -     | -     | -     | -    | -     | -         |
| 9                 | 34.623 | 1,<br>2-phenyldicarboxylate<br>butyloctyl ester              | -     | -     | 2.06  | -     | -     | -     | -     | -    | -     | -         |
| 10                | 34.706 | Ethyl hexadecanoate                                          | -     | -     | -     | 3.34  | -     | -     | -     | -    | 2.47  | 8.32      |
| 11                | 34.707 | Dibutyl phthalate                                            | -     | -     | -     | -     | 1.87  | -     | -     | -    | 2.38  | 19.3<br>4 |
| 12                | 34.976 | Ethyl hexadecanoate                                          | -     | -     | 1.89  | 8.87  | 1.10  | -     | -     | -    | 12.98 | 10.1<br>8 |
| 13                | 36.984 | Ethyl linoleate                                              | -     | -     | -     | 7.87  | -     | -     | -     | -    | -     | -         |
| 14                | 36.994 | Ethyl<br>octadecadienoate                                    | -     | -     | -     | -     | 2.22  | -     | -     | -    | 6.11  | 6.72      |
| 15                | 39.734 | Butyl octadecanoate                                          | -     | -     | -     | -     | -     | -     | -     | -    | 2.24  | -         |
| Carbonic<br>acids |        |                                                              |       |       |       |       |       |       |       |      |       |           |
| 1                 | 33.077 | Pentadecane acid                                             | -     | -     | -     | -     | -     | -     | -     | -    | -     | 0.42      |
| 2                 | 34.530 | Palmitic acid                                                | -     | -     | -     | -     | -     | -     | -     | 2.73 | 3.83  | -         |
| Aromatics         |        |                                                              |       |       |       |       |       |       |       |      |       |           |
| 1                 | 16.157 | Naphthalene                                                  | 0.83  | 7.29  | -     | -     | -     | 3.70  | 4.51  | 3.44 | -     | 2.37      |
| Olefins           |        |                                                              |       |       |       |       |       |       |       |      |       |           |
| 1                 | 10.963 | Dexilionene                                                  | -     | -     | -     | -     | -     | 1.10  | 1.46  | 1.12 | 0.66  | -         |
| 2                 | 16.691 | Tetramethylhexadeca<br>ne                                    | -     | -     | 11.57 | -     | -     | -     | -     | -    | -     | 1.11      |
| 3                 | 16.956 | Undecane                                                     | -     | -     | -     | -     | -     | 1.39  | 1.78  | -    | -     | -         |
| 4                 | 16.961 | Dodecane                                                     | 16.78 | 13.80 | -     | -     | -     | 13.40 | 9.59  | 4.21 | -     | 1.07      |
| 5                 | 19.571 | Trimethylkwai                                                | -     | -     | -     | 14.53 | -     | -     | -     | 7.37 | -     | -         |
| 6                 | 19.711 | Tridecane                                                    | 43.24 | 25.25 | 29.59 | -     | 21.29 | 19.57 | 18.59 | -    | 8.78  | 6.45      |
| 7                 | 20.593 | Dodecylcyclohexane                                           | 1.01  | 5.45  | 4.35  | 6.37  | 4.15  | 3.90  | 2.81  | 3.32 | 5.23  | 10.6      |

---

|    |        |                               |       |       |       |       |       |      |      |      |      |      |
|----|--------|-------------------------------|-------|-------|-------|-------|-------|------|------|------|------|------|
| 8  | 21.693 | 1-iodo2-methylundecane        | -     | -     | -     | 3.46  | -     | 7.33 | 6.62 | 5.00 | -    | -    |
| 9  | 22.233 | (E) - 9 - oleic               | -     | -     | -     | 1.04  | -     | -    | -    | -    | -    | -    |
| 10 | 22.274 | Tetradecene                   | -     | -     | -     | -     | -     | -    | -    | -    | -    | 0.30 |
| 11 | 22.502 | 9-methyl-decadecane           | -     | -     | 9.90  | -     | -     | -    | 3.28 | -    | -    | -    |
| 12 | 22.518 | Tetradecane                   | 12.58 | -     | 17.96 | 11.68 | 9.32  | -    | 8.46 | 6.11 | 5.10 | 2.62 |
| 13 | 22.782 | Hexadecane                    | -     | 19.11 | 5.31  | 7.66  | 10.21 | 9.89 | 5.17 | 6.12 | 5.70 | 2.65 |
| 14 | 23.805 | Nonyl-cyclopentane            | -     | -     | -     | -     | -     | -    | 3.19 | -    | -    | -    |
| 15 | 23.905 | (1-methylethyl)-cycloundecane | -     | -     | -     | -     | -     | -    | -    | 2.03 | -    | -    |
| 16 | 24.163 | 2,6,10-trimethyl-dodecane     | -     | -     | -     | -     | -     | -    | -    | 3.28 | -    | -    |
| 17 | 24.168 | 3,8-dimethyl-undecane         | -     | -     | -     | -     | -     | -    | 1.71 | -    | -    | -    |
| 18 | 24.946 | 1-tridecene                   | -     | -     | -     | -     | -     | -    | -    | -    | 0.82 | 0.44 |
| 19 | 24.967 | Pentadecane                   | -     | -     | -     | -     | -     | -    | -    | 6.18 | 4.04 | -    |
| 20 | 24.977 | Trichlorodocosyl-silane       | -     | -     | -     | -     | -     | -    | 2.41 | -    | -    | -    |
| 21 | 25.128 | 10-methyldecadecane           | -     | -     | -     | 5.11  | -     | -    | -    | -    | -    | -    |
| 22 | 25.953 | 1-chloro-heptacosane          | -     | -     | -     | -     | -     | -    | -    | 0.77 | 1.63 | -    |
| 23 | 26.088 | Trimethyl-tetracontane        | -     | -     | -     | -     | -     | -    | -    | 3.53 | -    | -    |
| 24 | 26.321 | Tetratetracontane             | -     | -     | -     | -     | 6.25  | -    | 4.16 | 1.94 | 3.32 | -    |
| 25 | 26.788 | (E)-2-tetradecene             | -     | -     | -     | 3.87  | -     | 4.78 | -    | -    | -    | 1.91 |
| 26 | 26.809 | (E)-2-tetradecene             | -     | 2.99  | -     | -     | -     | -    | -    | -    | -    | -    |
| 27 | 26.928 | 3-methyl-pentadecane          | -     | -     | -     | -     | 7.67  | -    | -    | -    | -    | -    |
| 28 | 27.312 | Cetene                        | -     | -     | -     | -     | -     | -    | -    | -    | 0.80 | 0.62 |
| 29 | 27.463 | [(dodecyloxy)methyl]-oxirane  | -     | -     | -     | -     | -     | -    | -    | 1.15 | -    | -    |

---

|        |        |                           |   |      |   |      |      |      |      |      |      |      |
|--------|--------|---------------------------|---|------|---|------|------|------|------|------|------|------|
| 30     | 27.463 | 1-(ethenyloxy)-octadecane | - | -    | - | 1.72 | -    | -    | -    | -    | -    | -    |
| 31     | 28.905 | 1-chloro-octadecane       | - | -    | - | -    | 1.69 | 1.54 | 1.51 | -    | -    | -    |
| 32     | 28.978 | Undecyl-cyclopentane      | - | -    | - | 2.56 | -    | 1.78 | -    | -    | -    | -    |
| 33     | 28.993 | Cyclohexadecane           | - | 2.10 | - | -    | -    | -    | -    | 2.04 | -    | -    |
| 34     | 30.016 | Heptadecane               | - | -    | - | -    | -    | -    | -    | -    | 3.63 | 0.71 |
| 35     | 30.15  | Tetramethylpentadecane    | - | -    | - | -    | -    | 2.04 | -    | -    | -    | 1.11 |
| 36     | 30.265 | Octadecane                | - | -    | - | -    | 2.79 | -    | -    | -    | -    | -    |
| Furans |        |                           |   |      |   |      |      |      |      |      |      |      |
| 1      | 7.72   | 2-pentylfuran             | - | -    | - | -    | 7.66 | 9.24 | 5.30 | 9.91 | 2.28 | 4.68 |
| Others |        |                           |   |      |   |      |      |      |      |      |      |      |
| 1      | 16.411 | 1-methylene - 1H-indene   | - | -    | - | 4.01 | -    | -    | -    | -    | -    | -    |

- not detected.
